# Supplementary material for: Haptic Nudging Using a Wearable Device to Promote Upper Limb Activity during Stroke Rehabilitation: Exploring Diurnal Variation, Repetition, and Duration of Effect
Source: MDPI journal article supplement (doi:10.3390/bs13120995), 2023-12-02
Supplement: s1 [file s1]

# Supplemental: Exploring diurnal variation, repetition, and duration of effect for haptic nudging

Usman Rashid

05/06/2023

## Contents

|          |                                                                                     |          |
|----------|-------------------------------------------------------------------------------------|----------|
| <b>1</b> | <b>Variables Included in the Analysis</b>                                           | <b>2</b> |
| <b>2</b> | <b>Data Visualisations</b>                                                          | <b>3</b> |
| 2.1      | UL Movement Distribution . . . . .                                                  | 3        |
| 2.2      | Participant-wise Proportions for AU+BiL+BiM . . . . .                               | 4        |
| 2.3      | Hour-wise AU+BiL+BiM Proportions across the Day . . . . .                           | 5        |
| 2.4      | AU+BiL+BiM Proportions for Movement Observations over 10-second Intervals . . . . . | 6        |
| <b>3</b> | <b>Instrumental Variable Analysis</b>                                               | <b>7</b> |
| 3.1      | Stage I: Confounder Estimation . . . . .                                            | 7        |
| 3.1.1    | Longitudnal Mixed Models . . . . .                                                  | 7        |
| 3.2      | Stage II: CASE Estimation . . . . .                                                 | 8        |
| 3.2.1    | Data Imputations . . . . .                                                          | 8        |
| 3.2.2    | Longitudnal Logistic Mixed Model . . . . .                                          | 8        |
| <b>4</b> | <b>Results</b>                                                                      | <b>9</b> |
| 4.1      | Immediate Effects of a Single Haptic Nudge on AUL Movement . . . . .                | 9        |
| 4.1.1    | Immediate Effects over the Day . . . . .                                            | 11       |
| 4.2      | Late Effects of a Single Haptic Nudge on AUL Movement . . . . .                     | 12       |
| 4.2.1    | Late Effects over the Day . . . . .                                                 | 13       |
| 4.3      | Effects of Repeated Nudges . . . . .                                                | 14       |
| 4.4      | Effects of Deferred Nudges . . . . .                                                | 16       |

## 1 Variables Included in the Analysis

```
## 'data.frame': 8640 obs. of 14 variables:
## $ ParticipantID : Factor w/ 20 levels "1","2","3","4",...: 1 1 1 1 1 1 1 1 1 1 ...
## $ Hour : Factor w/ 12 levels "1","2","3","4",...: 1 1 1 1 1 1 2 2 2 2 ...
## $ Time.labels : Factor w/ 72 levels "1:00 PM","1:10 PM",...: 55 56 57 58 59 60 61 ...
## $ Ten.minute.interval : num 1 2 3 4 5 6 7 8 9 10 ...
## $ Ten.second.interval : num 1 1 1 1 1 1 1 1 1 1 ...
## $ Nudge.status : Factor w/ 4 levels "Nudged","Not nudged",...: 3 2 1 3 1 2 2 2 1 1 ...
## $ Nudge.scheduled : Factor w/ 2 levels "Scheduled nudge",...: 1 2 1 1 1 2 2 2 1 1 ...
## $ Nudge.received : Factor w/ 2 levels "Nudged","Not nudged": 2 2 1 2 1 2 2 2 1 1 ...
## $ More.of.the.same.scheduled : num 0 0 0 1 2 0 1 2 0 1 ...
## $ More.of.the.opposite.scheduled: num 0 0 0 0 0 2 0 0 2 0 ...
## $ More.of.the.same : num 1 1 0 0 0 0 1 2 0 1 ...
## $ More.of.the.opposite : num 0 0 1 0 0 0 0 0 2 0 ...
## $ UL.movement : Factor w/ 6 levels "No","AU","UU",...: 6 1 3 6 1 1 3 3 3 3 ...
## $ Combined.UL.movement : Factor w/ 2 levels "UU+No","AU+BiL+BiM": NA 1 1 NA 1 1 1 1 1 1 ..
```

## 2 Data Visualisations

### 2.1 UL Movement Distribution

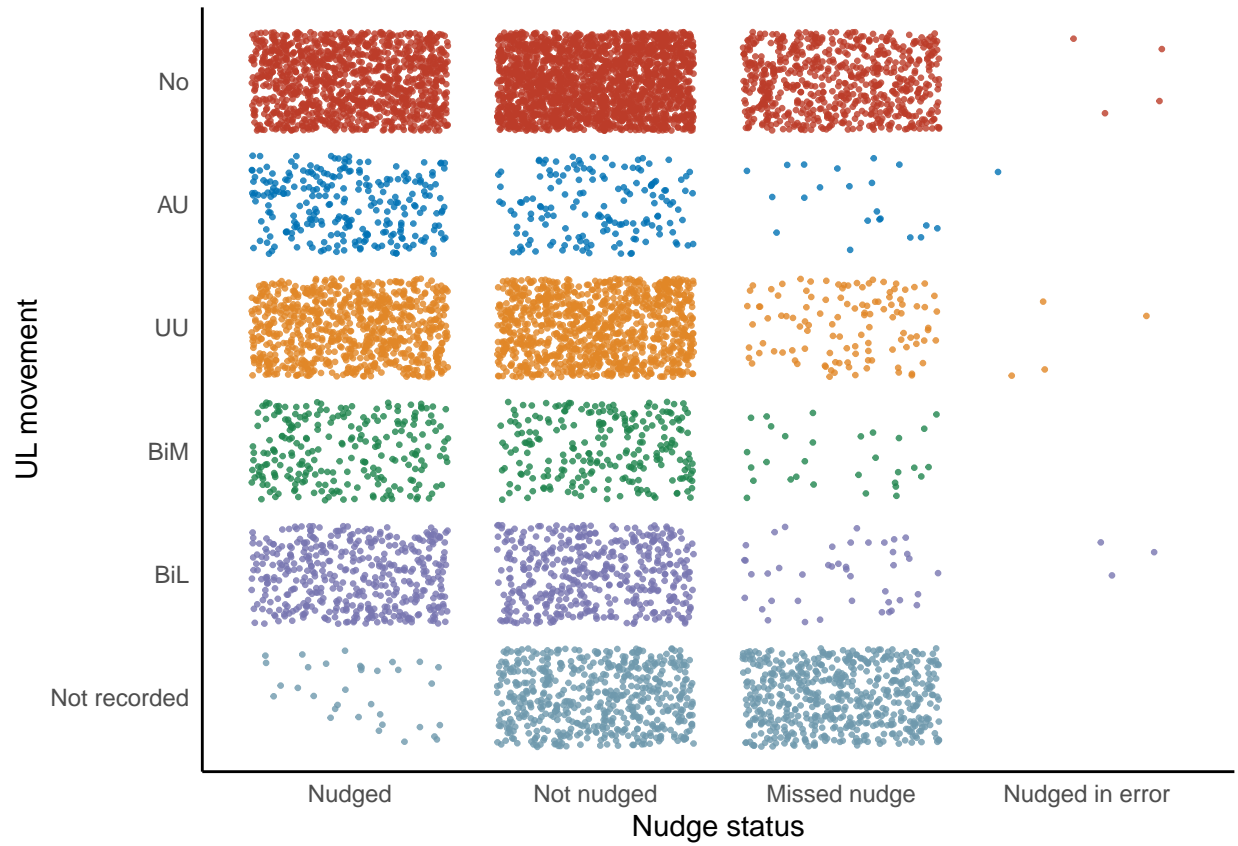

## 2.2 Participant-wise Proportions for AU+BiL+BiM

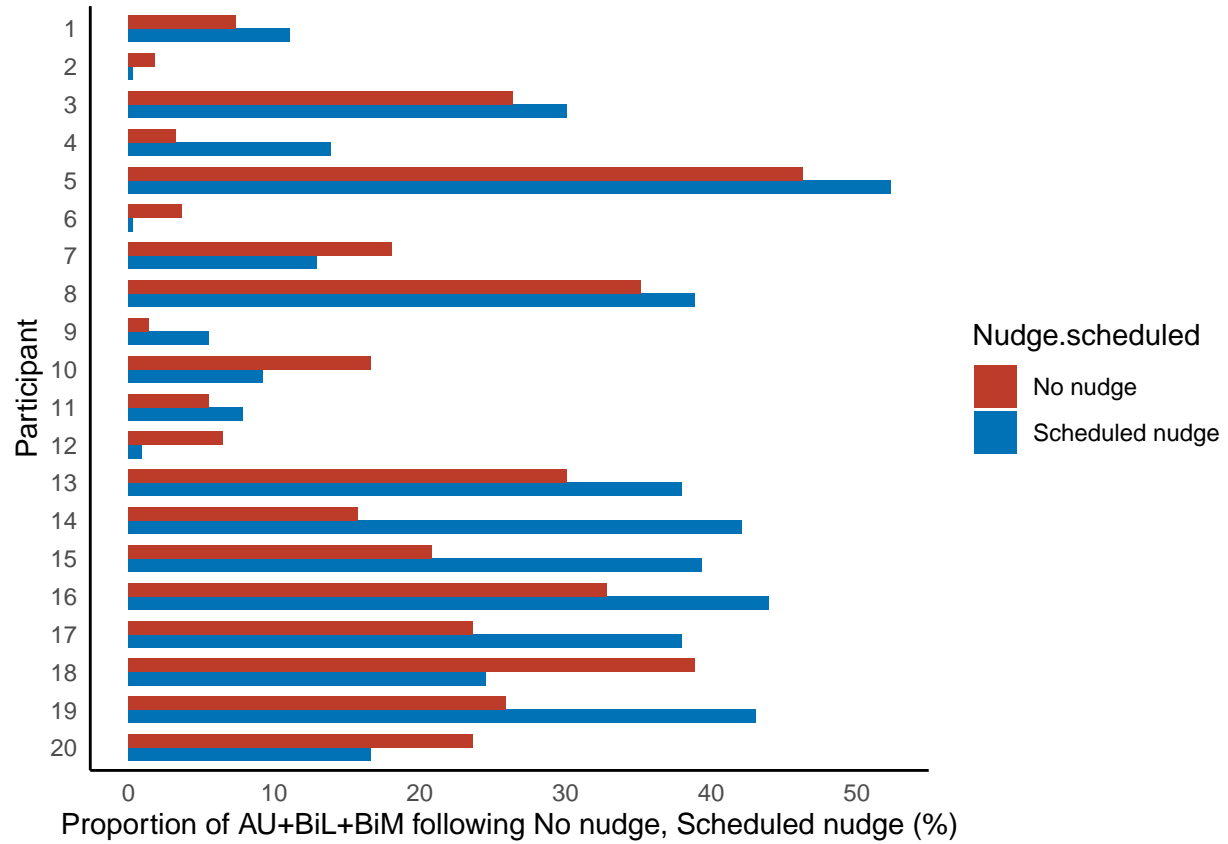

### 2.3 Hour-wise AU+BiL+BiM Proportions across the Day

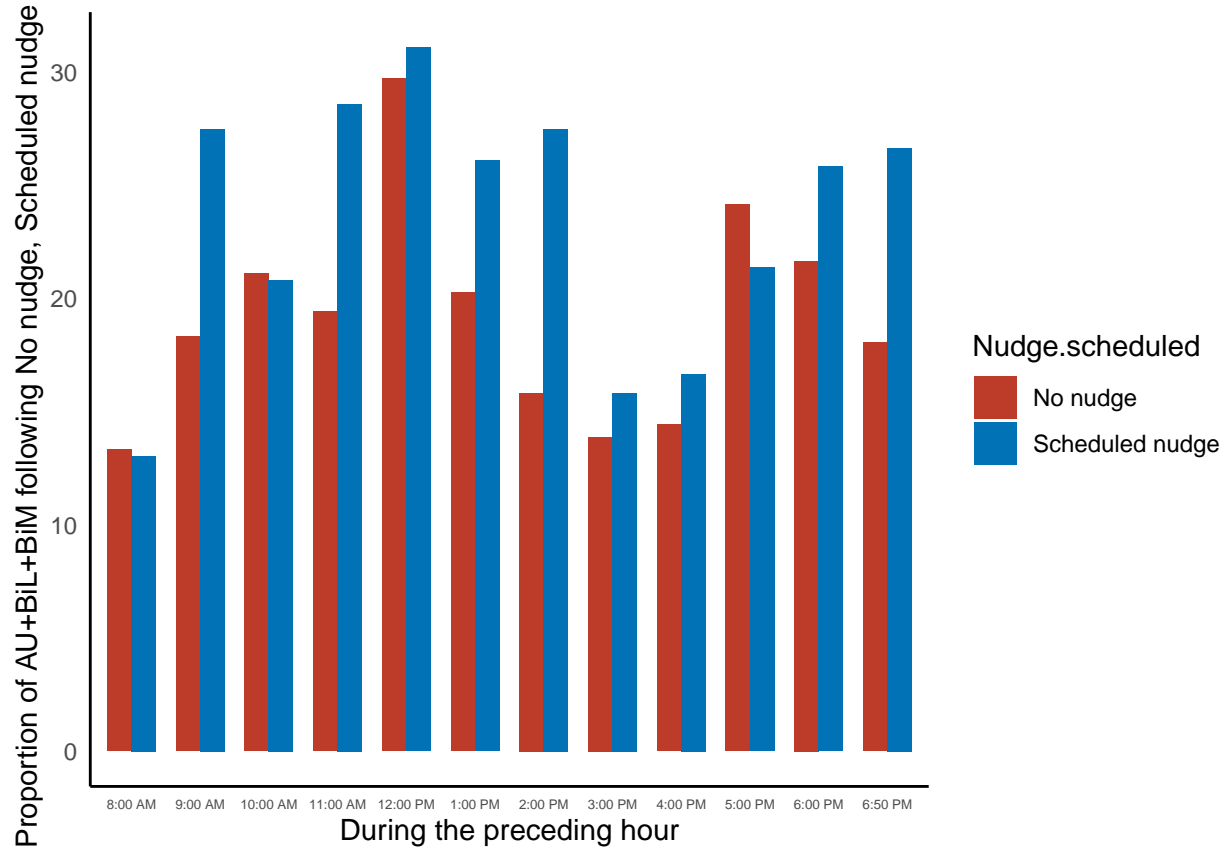

## 2.4 AU+BiL+BiM Proportions for Movement Observations over 10-second Intervals

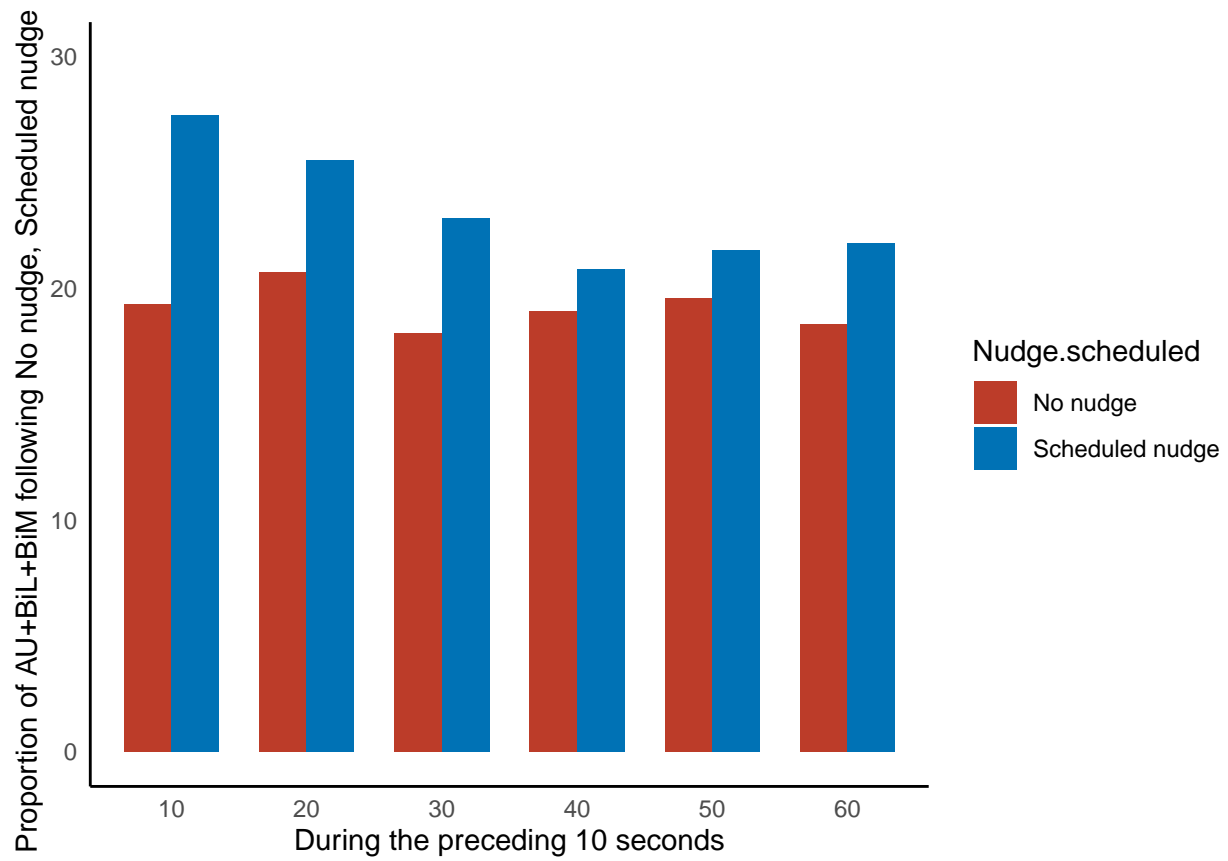

## 3 Instrumental Variable Analysis

### 3.1 Stage I: Confounder Estimation

#### 3.1.1 Longitudnal Mixed Models

```
# Load saved models to avoid repeated computation costs
# during report generation
LOAD_SAVED <- 1

if(LOAD_SAVED == 1) {
  load(file = 'Model_IV_NR.RData')
  load(file = 'Model_IV_MS.RData')
  load(file = 'Model_IV_MO.RData')
} else {

  Model.IV.NR <- glmer(Nudge.received ~ (ns(Ten.minute.interval, knots = seq(7, 67, 6)) +
    More.of.the.same.scheduled +
    More.of.the.opposite.scheduled) *
    Nudge.scheduled +
    (1|ParticipantID/Hour),
    family = binomial(link = "logit"),
    Data.source,
    control = glmerControl(optimizer = "bobyqa",
      optCtrl=list(maxfun = 1e6)))

  Model.IV.MS <- glmer(More.of.the.same ~ (ns(Ten.minute.interval, knots = seq(7, 67, 6)) +
    More.of.the.same.scheduled +
    More.of.the.opposite.scheduled) *
    Nudge.scheduled +
    (1|ParticipantID/Hour),
    family = poisson(link = "log"),
    Data.source,
    control = glmerControl(optimizer = "bobyqa",
      optCtrl=list(maxfun = 1e6)))

  Model.IV.MO <- glmer(More.of.the.opposite ~ (ns(Ten.minute.interval, knots = seq(7, 67, 6)) +
    More.of.the.same.scheduled +
    More.of.the.opposite.scheduled) *
    Nudge.scheduled +
    (1|ParticipantID/Hour),
    family = poisson(link = "log"),
    Data.source,
    control = glmerControl(optimizer = "bobyqa",
      optCtrl=list(maxfun = 1e6)))
}

# Obtain model residuals on the response scale

Data.source$NR.r <- resid(Model.IV.NR, type = "response")
Data.source$MS.r <- resid(Model.IV.MS, type = "response")
Data.source$MO.r <- resid(Model.IV.MO, type = "response")
```

## 3.2 Stage II: CASE Estimation

### 3.2.1 Data Imputations

```
# Random imputation at the level of the participant with the worst outcome

# Number of missing values following "No nudge" = 542
Random.no.nudge      <- factor(rbinom(542, 1, 6.4814815/100),
                               levels = c(0, 1), labels = c("UU+No", "AU+BiL+BiM"))

# Number of missing values following "Scheduled nudge" = 580
Random.nudge.schedule <- factor(rbinom(580, 1, 0.9259259/100),
                               levels = c(0, 1), labels = c("UU+No", "AU+BiL+BiM"))

Data.source$Combined.UL.movement[is.na(Data.source$Combined.UL.movement) &
                                   Data.source$Nudge.scheduled ==
                                   "No nudge"]      <- Random.no.nudge
Data.source$Combined.UL.movement[is.na(Data.source$Combined.UL.movement) &
                                   Data.source$Nudge.scheduled ==
                                   "Scheduled nudge"] <- Random.nudge.schedule
```

### 3.2.2 Longitudnal Logistic Mixed Model

```
# Load saved models to avoid repeated computation costs
# during report generation
LOAD_SAVED <- 1

if(LOAD_SAVED == 1) {
  load(file = 'Model_IV.RData')
} else {
  Model.IV <- glmer(Combined.UL.movement ~ (ns(Ten.minute.interval, knots = seq(7, 67, 6)) +
                                             More.of.the.same +
                                             More.of.the.opposite +
                                             Ten.second.interval) * Nudge.received +
                  NR.r + MS.r + MO.r +
                  (1|ParticipantID/Hour),
    data = Data.source,
    family = binomial(link = "logit"),
    control = glmerControl(optimizer = "bobyqa",
                           optCtrl=list(maxfun = 1e6)))
}
```



## 4 Results

### 4.1 Immediate Effects of a Single Haptic Nudge on AUL Movement

```

Marginal.effects <- emmeans(Model.IV, ~ Nudge.received:
  Ten.minute.interval:
  More.of.the.same:
  More.of.the.opposite:
  Ten.second.interval,
  at = list(Ten.minute.interval =
    c(seq(7, 12),
      seq(22, 27),
      seq(31, 36),
      seq(40, 45),
      seq(52, 57),
      seq(61, 66)),
    More.of.the.same = 0,
    More.of.the.opposite = 0,
    Ten.second.interval = 1),
  type = "response")

Daytime.effects <- contrast(Marginal.effects,
  list(Breakfast = # 8:00 AM to 9:00 AM
    c(rep(c(1/6, -1/6), 6), rep(0, 60))),
  Morning.activity = # 10:30 AM to 11:30 AM
    c(rep(0, 12), rep(c(1/6, -1/6), 6), rep(0, 48)),
  Lunch = # 12:00 PM to 1:00 PM
    c(rep(0, 24), rep(c(1/6, -1/6), 6), rep(0, 36)),
  Afternoon.activity = # 1:30 PM to 2:30 PM
    c(rep(0, 36), rep(c(1/6, -1/6), 6), rep(0, 24)),
  Rest = # 3:30 PM to 4:30 PM
    c(rep(0, 48), rep(c(1/6, -1/6), 6), rep(0, 12)),
  Dinner = # 5:00 PM to 6:00 PM
    c(rep(0, 60), rep(c(1/6, -1/6), 6)),
  Day = # 7:00 AM to 7:00 PM
    rep(c(1/36, -1/36), 36)))

```

| Time of the day    | Odds ratio | SE   | 95% CI lower | 95% CI upper | Z-value | P-value |
|--------------------|------------|------|--------------|--------------|---------|---------|
| Breakfast          | 2.58       | 0.66 | 1.57         | 4.26         | 3.72    | <0.001  |
| Morning.activity   | 2.01       | 0.47 | 1.27         | 3.17         | 2.99    | 0.003   |
| Lunch              | 2.17       | 0.53 | 1.35         | 3.49         | 3.20    | 0.001   |
| Afternoon.activity | 4.63       | 1.29 | 2.67         | 8.01         | 5.47    | <0.001  |
| Rest               | 2.51       | 0.67 | 1.49         | 4.22         | 3.45    | <0.001  |
| Dinner             | 1.36       | 0.32 | 0.86         | 2.16         | 1.30    | 0.194   |
| Day                | 2.37       | 0.41 | 1.68         | 3.34         | 4.95    | <0.001  |

| Contrast                     | Ratio of odds ratio | SE   | 95% CI lower | 95% CI upper | Z-value | P-value |
|------------------------------|---------------------|------|--------------|--------------|---------|---------|
| Breakfast / Morning.activity | 1.29                | 0.35 | 0.76         | 2.18         | 0.94    | 0.347   |

| Contrast                                 | Ratio of odds<br>ratio | SE   | 95% CI<br>lower | 95% CI<br>upper | Z-<br>value | P-<br>value |
|------------------------------------------|------------------------|------|-----------------|-----------------|-------------|-------------|
| Breakfast / Lunch                        | 1.19                   | 0.32 | 0.71            | 2.00            | 0.66        | 0.51        |
| Breakfast / Afternoon.activity           | 0.56                   | 0.17 | 0.31            | 1.00            | -1.97       | 0.049       |
| Breakfast / Rest                         | 1.03                   | 0.29 | 0.60            | 1.79            | 0.11        | 0.913       |
| Breakfast / Dinner                       | 1.90                   | 0.50 | 1.14            | 3.18            | 2.45        | 0.014       |
| Breakfast / Day                          | 1.09                   | 0.19 | 0.78            | 1.52            | 0.50        | 0.614       |
| Morning.activity / Lunch                 | 0.92                   | 0.26 | 0.53            | 1.61            | -0.28       | 0.782       |
| Morning.activity /<br>Afternoon.activity | 0.43                   | 0.13 | 0.24            | 0.79            | -2.76       | 0.006       |
| Morning.activity / Rest                  | 0.80                   | 0.23 | 0.46            | 1.40            | -0.78       | 0.435       |
| Morning.activity / Dinner                | 1.48                   | 0.39 | 0.88            | 2.47            | 1.49        | 0.137       |
| Morning.activity / Day                   | 0.85                   | 0.15 | 0.60            | 1.20            | -0.93       | 0.354       |
| Lunch / Afternoon.activity               | 0.47                   | 0.14 | 0.26            | 0.86            | -2.46       | 0.014       |
| Lunch / Rest                             | 0.87                   | 0.24 | 0.50            | 1.49            | -0.52       | 0.604       |
| Lunch / Dinner                           | 1.60                   | 0.41 | 0.97            | 2.64            | 1.83        | 0.067       |
| Lunch / Day                              | 0.92                   | 0.16 | 0.65            | 1.29            | -0.50       | 0.617       |
| Afternoon.activity / Rest                | 1.85                   | 0.57 | 1.01            | 3.37            | 2.00        | 0.046       |
| Afternoon.activity / Dinner              | 3.41                   | 1.01 | 1.90            | 6.10            | 4.12        | <0.001      |
| Afternoon.activity / Day                 | 1.95                   | 0.40 | 1.30            | 2.92            | 3.24        | 0.001       |
| Rest / Dinner                            | 1.84                   | 0.55 | 1.03            | 3.29            | 2.07        | 0.038       |
| Rest / Day                               | 1.06                   | 0.20 | 0.73            | 1.53            | 0.29        | 0.769       |
| Dinner / Day                             | 0.57                   | 0.10 | 0.41            | 0.80            | -3.23       | 0.001       |

## 4.1.1 Immediate Effects over the Day

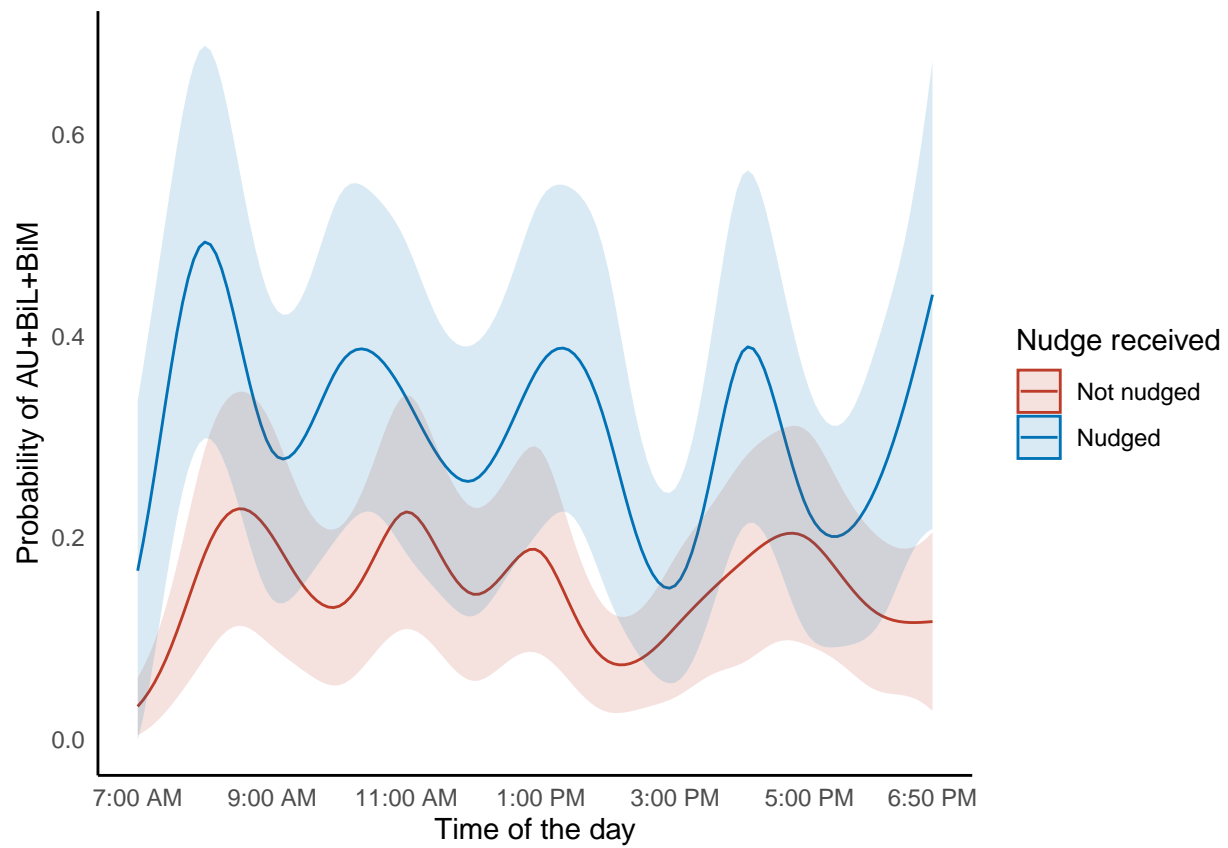

## 4.2 Late Effects of a Single Haptic Nudge on AUL Movement

```

Marginal.trends <- emtrends(Model.IV, ~ Nudge.received,
                           var = "Ten.second.interval",
                           type = "response")

Marginal.effects <- emmeans(Model.IV, ~ Nudge.received:
                           Ten.minute.interval:
                           More.of.the.same:
                           More.of.the.opposite:
                           Ten.second.interval,
                           at = list(Ten.minute.interval =
                                   c(seq(7, 12),
                                       seq(22, 27),
                                       seq(31, 36),
                                       seq(40, 45),
                                       seq(52, 57),
                                       seq(61, 66)),
                                   More.of.the.same = 0,
                                   More.of.the.opposite = 0,
                                   Ten.second.interval = 6),
                           type = "response")

Daytime.effects <- contrast(Marginal.effects,
                           list(Breakfast = # 8:00 AM to 9:00 AM
                                c(rep(c(1/6, -1/6), 6), rep(0, 60)),
                                Morning.activity = # 10:30 AM to 11:30 AM
                                c(rep(0, 12), rep(c(1/6, -1/6), 6), rep(0, 48)),
                                Lunch = # 12:00 PM to 1:00 PM
                                c(rep(0, 24), rep(c(1/6, -1/6), 6), rep(0, 36)),
                                Afternoon.activity = # 1:30 PM to 2:30 PM
                                c(rep(0, 36), rep(c(1/6, -1/6), 6), rep(0, 24)),
                                Rest = # 3:30 PM to 4:30 PM
                                c(rep(0, 48), rep(c(1/6, -1/6), 6), rep(0, 12)),
                                Dinner = # 5:00 PM to 6:00 PM
                                c(rep(0, 60), rep(c(1/6, -1/6), 6)),
                                Day = # 7:00 AM to 7:00 PM
                                rep(c(1/36, -1/36), 36)))

```

| Nudge.received | Ten.second.interval.trend | SE   | 95% CI lower | 95% CI upper | Z-value | P-value |
|----------------|---------------------------|------|--------------|--------------|---------|---------|
| Nudged         | -0.11                     | 0.03 | -0.17        | -0.06        | -4.24   | <0.001  |
| Not nudged     | 0.00                      | 0.02 | -0.05        | 0.04         | -0.14   | 0.887   |

| Time of the day    | Odds ratio | SE   | 95% CI lower | 95% CI upper | Z-value | P-value |
|--------------------|------------|------|--------------|--------------|---------|---------|
| Breakfast          | 1.49       | 0.38 | 0.90         | 2.46         | 1.57    | 0.117   |
| Morning.activity   | 1.16       | 0.27 | 0.73         | 1.83         | 0.63    | 0.526   |
| Lunch              | 1.25       | 0.30 | 0.78         | 2.02         | 0.93    | 0.351   |
| Afternoon.activity | 2.67       | 0.75 | 1.54         | 4.62         | 3.51    | <0.001  |

| Time of the day | Odds ratio | SE   | 95% CI lower | 95% CI upper | Z-value | P-value |
|-----------------|------------|------|--------------|--------------|---------|---------|
| Rest            | 1.45       | 0.39 | 0.86         | 2.44         | 1.39    | 0.166   |
| Dinner          | 0.78       | 0.19 | 0.49         | 1.25         | -1.02   | 0.306   |
| Day             | 1.37       | 0.24 | 0.97         | 1.93         | 1.80    | 0.073   |

#### 4.2.1 Late Effects over the Day

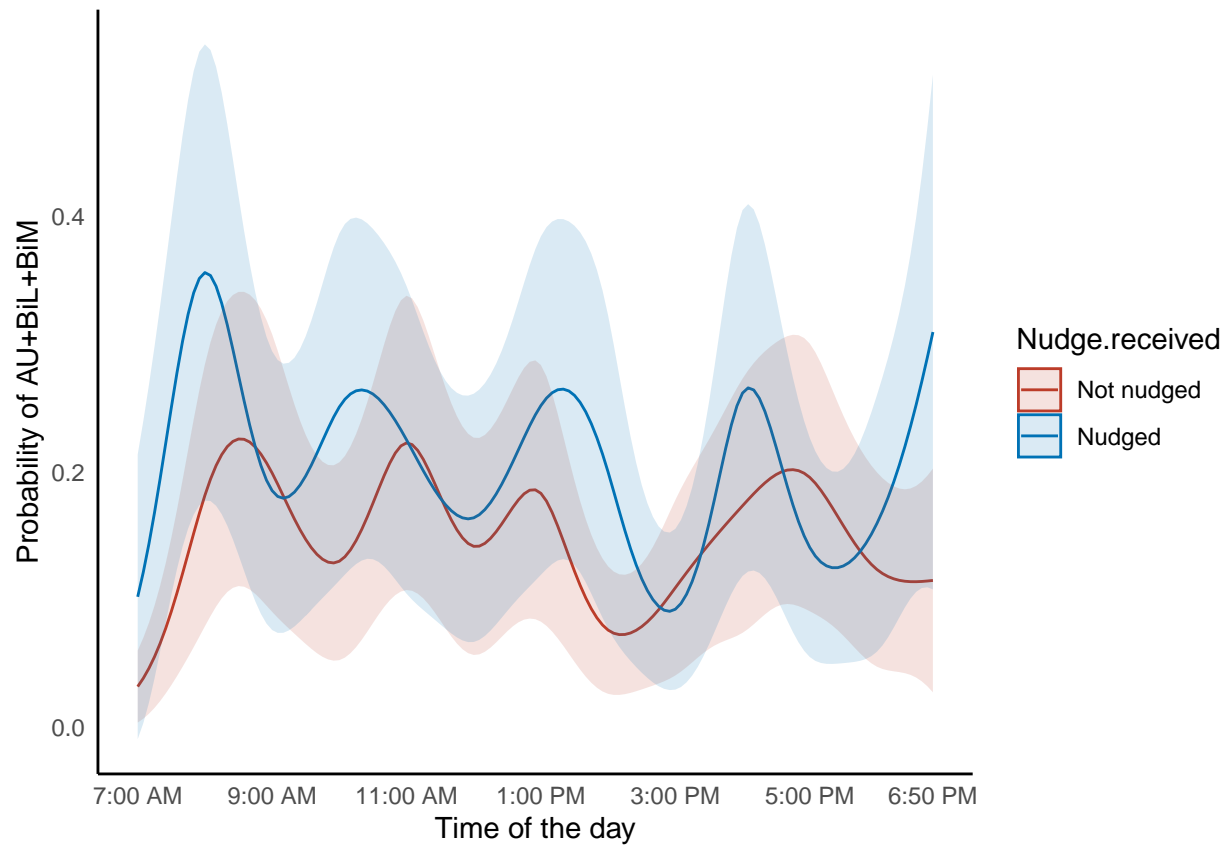

### 4.3 Effects of Repeated Nudges

```

Marginal.trends <- emtrends(Model.IV, ~ Nudge.received,
                           var = "More.of.the.same",
                           type = "response")

Marginal.effects <- emmeans(Model.IV, ~ Nudge.received:
                             Ten.minute.interval:
                             More.of.the.same:
                             More.of.the.opposite |
                             Ten.second.interval,
                             at = list(Ten.minute.interval =
                                       c(seq(7, 12),
                                         seq(22, 27),
                                         seq(31, 36),
                                         seq(40, 45),
                                         seq(52, 57),
                                         seq(61, 66)),
                                       More.of.the.same = 2,
                                       More.of.the.opposite = 0,
                                       Ten.second.interval = c(1, 6)),
                             type = "response")

Daytime.effects <- contrast(Marginal.effects,
                           list(Breakfast = # 8:00 AM to 9:00 AM
                                c(rep(c(1/6, -1/6), 6), rep(0, 60)),
                                Morning.activity = # 10:30 AM to 11:30 AM
                                c(rep(0, 12), rep(c(1/6, -1/6), 6), rep(0, 48)),
                                Lunch = # 12:00 PM to 1:00 PM
                                c(rep(0, 24), rep(c(1/6, -1/6), 6), rep(0, 36)),
                                Afternoon.activity = # 1:30 PM to 2:30 PM
                                c(rep(0, 36), rep(c(1/6, -1/6), 6), rep(0, 24)),
                                Rest = # 3:30 PM to 4:30 PM
                                c(rep(0, 48), rep(c(1/6, -1/6), 6), rep(0, 12)),
                                Dinner = # 5:00 PM to 6:00 PM
                                c(rep(0, 60), rep(c(1/6, -1/6), 6)),
                                Day = # 7:00 AM to 7:00 PM
                                rep(c(1/36, -1/36), 36)))

```

| Nudge.received | More.of.the.same.trend | SE   | 95% CI lower | 95% CI upper | Z-value | P-value |
|----------------|------------------------|------|--------------|--------------|---------|---------|
| Nudged         | -0.10                  | 0.10 | -0.3         | 0.11         | -0.92   | 0.357   |
| Not nudged     | -0.23                  | 0.09 | -0.4         | -0.06        | -2.62   | 0.009   |

| Time of the day  | Im./Late  | Odds ratio | SE   | 95% CI lower | 95% CI upper | Z-value | P-value |
|------------------|-----------|------------|------|--------------|--------------|---------|---------|
| Breakfast        | Immediate | 3.37       | 0.79 | 2.13         | 5.35         | 5.16    | <0.001  |
| Morning.activity | Immediate | 2.62       | 0.65 | 1.61         | 4.26         | 3.89    | <0.001  |
| Lunch            | Immediate | 2.83       | 0.65 | 1.81         | 4.43         | 4.56    | <0.001  |

| Time of the day    | Im./Late  | Odds ratio | SE   | 95% CI<br>lower | 95% CI<br>upper | Z-value | P-value |
|--------------------|-----------|------------|------|-----------------|-----------------|---------|---------|
| Afternoon.activity | Immediate | 6.04       | 1.63 | 3.56            | 10.25           | 6.66    | <0.001  |
| Rest               | Immediate | 3.27       | 0.82 | 2.00            | 5.34            | 4.74    | <0.001  |
| Dinner             | Immediate | 1.77       | 0.42 | 1.11            | 2.83            | 2.40    | 0.016   |
| Day                | Immediate | 3.09       | 0.51 | 2.25            | 4.26            | 6.90    | <0.001  |
| Breakfast          | Late      | 1.95       | 0.46 | 1.23            | 3.09            | 2.82    | 0.005   |
| Morning.activity   | Late      | 1.51       | 0.38 | 0.93            | 2.46            | 1.67    | 0.095   |
| Lunch              | Late      | 1.64       | 0.37 | 1.04            | 2.56            | 2.15    | 0.032   |
| Afternoon.activity | Late      | 3.49       | 0.94 | 2.05            | 5.92            | 4.62    | <0.001  |
| Rest               | Late      | 1.89       | 0.47 | 1.16            | 3.09            | 2.54    | 0.011   |
| Dinner             | Late      | 1.02       | 0.25 | 0.64            | 1.64            | 0.10    | 0.922   |
| Day                | Late      | 1.79       | 0.29 | 1.29            | 2.47            | 3.52    | <0.001  |

## 4.4 Effects of Deferred Nudges

```

Marginal.trends <- emtrends(Model.IV, ~ Nudge.received,
                             var = "More.of.the.opposite",
                             type = "response")

Marginal.effects <- emmeans(Model.IV, ~ Nudge.received:
                             Ten.minute.interval:
                             More.of.the.same:
                             More.of.the.opposite |
                             Ten.second.interval,
                             at = list(Ten.minute.interval =
                                       c(seq(7, 12),
                                         seq(22, 27),
                                         seq(31, 36),
                                         seq(40, 45),
                                         seq(52, 57),
                                         seq(61, 66)),
                                       More.of.the.same = 0,
                                       More.of.the.opposite = 2,
                                       Ten.second.interval = c(1, 6)),
                             type = "response")

Daytime.effects <- contrast(Marginal.effects,
                             list(Breakfast = # 8:00 AM to 9:00 AM
                                   c(rep(c(1/6, -1/6), 6), rep(0, 60)),
                                   Morning.activity = # 10:30 AM to 11:30 AM
                                   c(rep(0, 12), rep(c(1/6, -1/6), 6), rep(0, 48)),
                                   Lunch = # 12:00 PM to 1:00 PM
                                   c(rep(0, 24), rep(c(1/6, -1/6), 6), rep(0, 36)),
                                   Afternoon.activity = # 1:30 PM to 2:30 PM
                                   c(rep(0, 36), rep(c(1/6, -1/6), 6), rep(0, 24)),
                                   Rest = # 3:30 PM to 4:30 PM
                                   c(rep(0, 48), rep(c(1/6, -1/6), 6), rep(0, 12)),
                                   Dinner = # 5:00 PM to 6:00 PM
                                   c(rep(0, 60), rep(c(1/6, -1/6), 6)),
                                   Day = # 7:00 AM to 7:00 PM
                                   rep(c(1/36, -1/36), 36)))

```

| Nudge.received | More.of.the.opposite.trend | SE   | 95% CI lower | 95% CI upper | Z-value | P-value |
|----------------|----------------------------|------|--------------|--------------|---------|---------|
| Nudged         | -0.35                      | 0.10 | -0.53        | -0.16        | -3.62   | <0.001  |
| Not nudged     | -0.05                      | 0.09 | -0.22        | 0.12         | -0.55   | 0.582   |

| Time of the day    | Im./Late  | Odds ratio | SE   | 95% CI lower | 95% CI upper | Z-value | P-value |
|--------------------|-----------|------------|------|--------------|--------------|---------|---------|
| Breakfast          | Immediate | 1.42       | 0.35 | 0.87         | 2.32         | 1.41    | 0.157   |
| Morning.activity   | Immediate | 1.11       | 0.29 | 0.66         | 1.84         | 0.38    | 0.701   |
| Lunch              | Immediate | 1.19       | 0.29 | 0.74         | 1.93         | 0.73    | 0.465   |
| Afternoon.activity | Immediate | 2.55       | 0.72 | 1.46         | 4.44         | 3.29    | 0.001   |



| Time of the day    | Im./Late  | Odds ratio | SE   | 95% CI<br>lower | 95% CI<br>upper | Z-value | P-value |
|--------------------|-----------|------------|------|-----------------|-----------------|---------|---------|
| Rest               | Immediate | 1.38       | 0.36 | 0.82            | 2.31            | 1.22    | 0.223   |
| Dinner             | Immediate | 0.75       | 0.19 | 0.46            | 1.22            | -1.17   | 0.244   |
| Day                | Immediate | 1.30       | 0.24 | 0.91            | 1.87            | 1.45    | 0.146   |
| Breakfast          | Late      | 0.82       | 0.21 | 0.50            | 1.34            | -0.79   | 0.432   |
| Morning.activity   | Late      | 0.64       | 0.17 | 0.38            | 1.06            | -1.72   | 0.086   |
| Lunch              | Late      | 0.69       | 0.17 | 0.43            | 1.12            | -1.51   | 0.131   |
| Afternoon.activity | Late      | 1.47       | 0.42 | 0.84            | 2.57            | 1.35    | 0.177   |
| Rest               | Late      | 0.80       | 0.21 | 0.47            | 1.34            | -0.86   | 0.392   |
| Dinner             | Late      | 0.43       | 0.11 | 0.26            | 0.71            | -3.34   | <0.001  |
| Day                | Late      | 0.75       | 0.14 | 0.52            | 1.08            | -1.53   | 0.126   |
